# Supplementary material for: Novel Biomarkers for Change in Renal Function in People With Dysglycemia
Source: Oxford University Press journal article supplement (doi:10.2337/dc19-1604), 2019-11-14
Supplement: dc191604supplementarydata.pdf [file dc191604supplementarydata.pdf]

## SUPPLEMENTARY DATA

### Supplementary Figure S1

Calibration plot comparing the observed change in eGFR per year to the predicted value based on either the cardiovascular model (Panel A) or the renal model (Panel B) in all 7482 participants. The mean and 95% confidence intervals for the predicted change value are shown for each decile of the mean observed value.

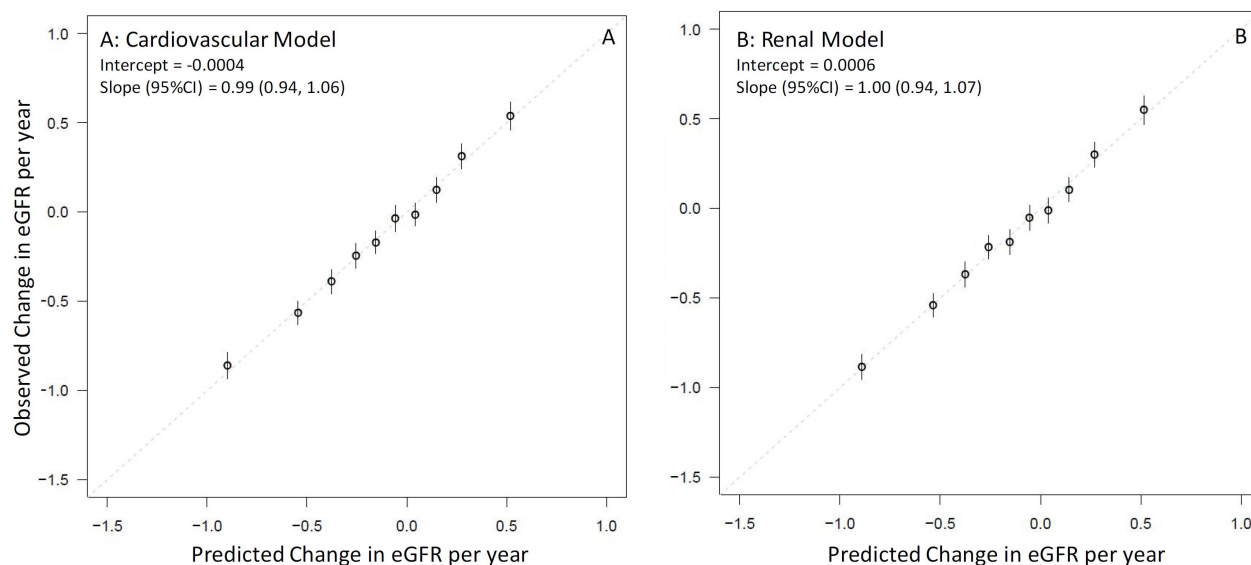

SUPPLEMENTARY DATA

**Supplementary Table S1. Participants in the ORIGIN Renal Biomarker Study**

| Characteristics                             | Participants/Concentration |
|---------------------------------------------|----------------------------|
| N                                           | 7482                       |
| Male                                        | 4939 (66.0)                |
| Mean Age (years)                            | 63.5 (7.8)                 |
| Men $\geq$ 55 or Women $\geq$ 65 years      | 5218 (69.7)                |
| Region                                      |                            |
| N. America or Australia                     | 1263 (16.9)                |
| S. America                                  | 2461 (32.9)                |
| Europe                                      | 3421 (45.7)                |
| India                                       | 337 (4.5)                  |
| Current Smoking                             | 901 (12.0)                 |
| Prior diabetes                              | 6073 (81.2)                |
| Hypertension                                | 5901 (78.9)                |
| Prior Cardiovascular Event                  | 4402 (58.8)                |
| Mean Blood Pressure                         | 146 (22)/ 85 (12)          |
| Mean Arterial Pressure (SD)                 | 105 (14)                   |
| Reported/Measured Micro or Macroalbuminuria | 2290 (30.6)                |
| Mean Log2 (albumin/creatinine)              | -0.15 (1.61)               |
| Mean LDL Cholesterol (mmol/L)               | 2.89 (1.02)                |
| Mean HDL Cholesterol (mmol/L)               | 1.18 (0.32)                |
| Mean BMI (kg/m <sup>2</sup> )               | 30.1 (5.3)                 |
| Mean HbA1c (%)                              | 6.49 (0.94)                |
| Mean eGFR (ml/min/1.73m <sup>2</sup> )      | 77.8 (21.3)                |
| eGFR < 60 (%)                               | 1405 (18.8)                |
| eGFR $\geq$ 60 (%)                          | 6077 (81.2)                |
| ACE-I or ARB                                | 5152 (68.9)                |
| Allocation to Glargine                      | 3716 (49.7)                |

Results are expressed as N(%), Mean (SD) or Median (IQR)

# SUPPLEMENTARY DATA

**Supplementary Table S2. Independent Biomarkers of Annual Change in eGFR Adjusted for Baseline eGFR in N=7482**

| Risk Factor                          | CV Clinical Model<br>Beta (95%CI)    | Renal Clinical Model<br>Beta (95%CI) | Combined Model<br>Beta (95%CI)       |
|--------------------------------------|--------------------------------------|--------------------------------------|--------------------------------------|
| Alpha-1-Microglobulin                | -0.129 (-0.159, -0.099)              | -0.157 (-0.185, -0.128)              | -0.154 (-0.183, -0.126)              |
| NT-proBNP                            | -0.094 (-0.114, -0.074)              | -0.081 (-0.101, -0.062)              | -0.085 (-0.105, -0.065)              |
| IGFBP4                               | -0.112 (-0.144, -0.080) <sup>a</sup> | -0.110 (-0.142, -0.078) <sup>b</sup> | -0.119 (-0.151, -0.086) <sup>c</sup> |
| Growth/Differentiation Factor 15     | -0.080 (-0.109, -0.052)              | -0.091 (-0.118, -0.064)              | -0.090 (-0.118, -0.062)              |
| RAGE                                 | -0.053 (-0.077, -0.029)              | -0.052 (-0.077, -0.027)              | -0.064 (-0.088, -0.040)              |
| Myoglobin                            | -0.077 (-0.102, -0.052)              | -0.073 (-0.098, -0.048)              | -0.075 (-0.100, -0.049)              |
| Growth-Regulated alpha protein       | 0.059 (0.034, 0.083)                 | 0.058 (0.033, 0.082)                 | 0.057 (0.032, 0.081)                 |
| Fibulin-1C                           | -0.060 (-0.085, -0.034)              | -0.048 (-0.073, -0.023)              | N/A                                  |
| Urokinase-type Plasminogen Activator | 0.034 (0.010, 0.059)                 | N/A                                  | N/A                                  |
| Apolipoprotein A-IV                  | -0.054 (-0.078, -0.030)              | -0.057 (-0.081, -0.032)              | -0.055 (-0.079, -0.030)              |
| Kidney Injury Molecule-1             | -0.035 (-0.052, -0.018)              | N/A                                  | N/A                                  |
| Apolipoprotein A-II                  | 0.063 (0.038, 0.087)                 | 0.065 (0.041, 0.089)                 | 0.069 (0.044, 0.094)                 |
| Retinol-binding protein 4            | -0.054 (-0.082, -0.027)              | N/A                                  | N/A                                  |
| Fas Ligand                           | -0.086 (-0.124, -0.048)              | -0.099 (-0.138, -0.060)              | -0.099 (-0.138, -0.060)              |
| Eotaxin-1                            | -0.047 (-0.070, -0.023)              | -0.052 (-0.075, -0.028)              | -0.049 (-0.073, -0.025)              |
| Beta Amyloid 1-40                    | N/A                                  | -0.057 (-0.081, -0.032)              | -0.055 (-0.080, -0.029)              |

These biomarkers were identified by forward selection. Variables included in the combined clinical model were: age, sex, prior CV event, prior diabetes, prior hypertension, mean arterial pressure, current smoking, former smoking, body mass index, log2 (albumin/creatinine), cholesterol levels, LDL/HDL, baseline eGFR, and HbA1c. There was a significant interaction between IGF BP4 and glargine allocation. For the CV model<sup>a</sup> after accounting for this interaction (P=0.002), beta (glargine)=-0.177(-0.225,-0.129), and beta (standard care)= -0.058 (-0.100, -0.015). For the renal model<sup>b</sup> after accounting for this interaction (P=0.0008), beta (glargine)=-0.168(-0.215, -0.121) and beta (standard care) = -0.060 (-0.103, -0.018). For the combined model<sup>c</sup> after accounting for this interaction (P=0.0007), beta (glargine) =-0.180 (-0.228, -0.132) and beta (standard care) = -0.066 (-0.109, -0.024).

SUPPLEMENTARY DATA

**Supplementary Table S3. Variance of the Annual Change in eGFR that is Explained by the Clinical Variables Alone and by the Clinical Variables Plus the Identified Biomarkers ( $R^2$ )**

|                             | Clinical Variables<br>Alone | Clinical Variables +<br>Selected Biomarkers | Difference in Log-<br>Likelihood | P       |
|-----------------------------|-----------------------------|---------------------------------------------|----------------------------------|---------|
| <b>CV Clinical Model</b>    | 0.040 (0.032, 0.050)        | 0.158 (0.141, 0.174)                        | 967 (837, 1098)                  | <0.0001 |
| <b>Renal Clinical Model</b> | 0.053 (0.043, 0.063)        | 0.155 (0.139, 0.172)                        | 849 (733, 966)                   | <0.0001 |

$R^2$  and the difference in log-likelihood were estimated from 1000 samples of the data using bootstrapping with replacement; A log-likelihood value > 37.7 for the CV model with 15 biomarkers, and a value > 34.5 for the renal model with 13 biomarkers would indicate significance at an  $\alpha=0.001$ .

# SUPPLEMENTARY DATA

**Supplementary Table S4. HR of Death and of the Renal Composite Outcome for every 0.1 ml/min/1.73 m<sup>2</sup> Predicted Annual Decline in eGFR based on Clinical Risk Factors and Biomarkers**

|                             | Death<br>HR (95%CI) | Original Renal Composite <sup>a</sup><br>HR (95%CI) | New Renal Composite <sup>b</sup><br>HR (95%CI) |
|-----------------------------|---------------------|-----------------------------------------------------|------------------------------------------------|
| <b>Cardiovascular Model</b> | 1.13 (1.12, 1.14)   | 1.11 (1.10, 1.12)                                   | 1.28 (1.25, 1.31)                              |
| <b>Renal Model</b>          | 1.13 (1.12, 1.14)   | 1.10 (1.09, 1.12)                                   | 1.27 (1.25, 1.31)                              |

<sup>a</sup>renal replacement therapy, renal death, renal failure, albuminuria category progression, or doubling of serum creatinine from baseline; <sup>b</sup>renal replacement therapy, renal death, renal failure, or doubling of serum creatinine from baseline

SUPPLEMENTARY DATA

**Supplementary Table S5. Renal Dysfunction Model Performance For Predicting Death or the Renal Composite Outcome**

|                             | Clinical Risk<br>Factors<br>C (95%CI) | Clinical Risk Factors<br>Plus Biomarkers<br>C (95%CI) | Net Reclassification<br>Improvement<br>(95%CI) | IDI (95%CI)*         |
|-----------------------------|---------------------------------------|-------------------------------------------------------|------------------------------------------------|----------------------|
| <b>Death</b>                |                                       |                                                       |                                                |                      |
| <i>Cardiovascular Model</i> | 0.62 (0.60, 0.63)                     | 0.67 (0.66, 0.69)                                     | 0.192 (0.153, 0.232)                           | 0.040 (0.033, 0.047) |
| <i>Renal Model</i>          | 0.67 (0.65, 0.68)                     | 0.68 (0.67, 0.70)                                     | 0.027 (0, 0.065)                               | 0.000 (0, 0.007)     |
| <b>Renal Composite</b>      |                                       |                                                       |                                                |                      |
| <i>Cardiovascular Model</i> | 0.61 (0.59, 0.62)                     | 0.63 (0.61, 0.64)                                     | 0.031 (0.020, 0.042)                           | 0.017 (0.010, 0.024) |
| <i>Renal Model</i>          | 0.60 (0.59, 0.62)                     | 0.62 (0.61, 0.64)                                     | 0.050 (0.041, 0.060)                           | 0.017 (0.010, 0.023) |

\*integrated discrimination improvement
